# Supplementary material
Source: publisher figshare collection journal article supplement (https://sage.figshare.com/ndownloader/files/13765259)
Supplement: Supplementary file 1 [file 13765259]

**Table 1b. Detailed profiles of respondents**

| **FGD 1** | | | | | | | | | |
| --- | --- | --- | --- | --- | --- | --- | --- | --- | --- |
| **R** | **Age** | **Number of children** | **Employment status** | **Marital Status** | **Religion** | **Education** | **Ethnicity** | **Time (in weeks) from presentation to treatment** | **Disease stage** |
| 1 | 41 | - | Trader | Married | Christian | Primary | Ewe | 5 | 2 |
| 2 | 45 | 5 | Trader | Married | Christian | Primary | Akan | 29 | 1 |
| 3 | 56 | 4 | Trader | Married | Christian | JHS | Ewe | 7 | 2 |
| 4 | 49 | 3 | Trader | Married | Christian | SHS | Akan | 5 | 2 |
| 5 | 48 | 2 | Trader | Married | Christian | JHS | Ewe | 6 | 1 |
| **FGD 2** | | | | | | | | | |
| **R** | **Age** | **Number of children** | **Employment status** | **Marital Status** | **Religion** | **Education** | **Ethnicity** | **Time (in weeks) from presentation to treatment** | **Disease stage** |
| 1 | 33 | 2 | Hairdresser | Married | Christian | JHS | Ga | 13 | 2 |
| 2 | 48 | 0 | Journalist | Married | Christian | Tertiary | Bimoba | 6 | 1 |
| 3 | 64 | 4 | Retired | Married | Christian | SHS | Akan | - | 2 |
| 4 | 45 | 3 | Trader | Married | Christian | JHS | Ga | 3 | 2 |
| 5 | 52 | 5 | Trader | Separated | Christian | None | Ga | 13 | 2 |
| **FGD 3** | | | | | | | | | |
| **R** | **Age** | **Number of children** | **Employment status** | **Marital Status** | **Religion** | **Education** | **Ethnicity** | **Time (in weeks) from presentation to treatment** | **Disease stage** |
| 1 | 55 | 2 | Accra Metropolitan Assembly staff | widowed | Christian | SHS | Fante | 5 | 3 |
| 2 | 51 | 2 | Nurse | married | Christian | Tertiary | Kudaasi | 6 | 2 |
| 3 | 40 | 2 | Working at National theatre | married | Christian | Tertiary | Akan | 50 | 2 |
| 4 | 71 | 3 | not working | Widowed | Christian | Tertiary | Akan | 2 | 2 |
| **FGD 4** | | | | | | | | | |
| **R** | **Age** | **Number of children** | **Employment status** | **Marital Status** | **Religion** | **Education** | **Ethnicity** | **Time (in weeks) from presentation to treatment** | **Disease stage** |
| 1 | 62 | 9 | Sells cassava | Separated | none | none | Ga | 52 | 4 |
| 2 | 51 | 4 | Teacher | Married | Christian | SHS | Akan | 5 | 4 |
| 3 | 39 | 2 | Trader | Married | Christian | - | Ga | 3 | 4 |
| 4 | 48 | 0 | Trader | Married | Christian | - | Ewe | 6 | 4 |
| 5 | 64 | 0 | Seamstress | Married | Christian | - | Akan | 3 | 4 |
| 6 | 50 | 5 | Farmer | Married | Christian | - | Akan | 41 | 4 |
